# Supplementary material for: Inclusion complexes of triblock L35 copolymer and hydroxyl propyl cyclodextrins: a physico-chemical study
Source: Royal Society of Chemistry journal article supplement (doi:10.1039/d2nj00486k), 2022-01-01
Supplement: d2nj00486k1.pdf [file d2nj00486k1.pdf]

**Electronic Supplementary Information (ESI)**

**Inclusion complexes of triblock L35 copolymer and hydroxyl propyl cyclodextrins: a physico-chemical study**

Martina Maria Calvino, Giuseppe Lazzara, Giuseppe Cavallaro\*, Stefana Milioto,

*Dipartimento di Fisica e Chimica, Università degli Studi di Palermo, Viale delle Scienze, pad. 17, 90128 Palermo, Italy. giuseppe.cavallaro@unipa.it*

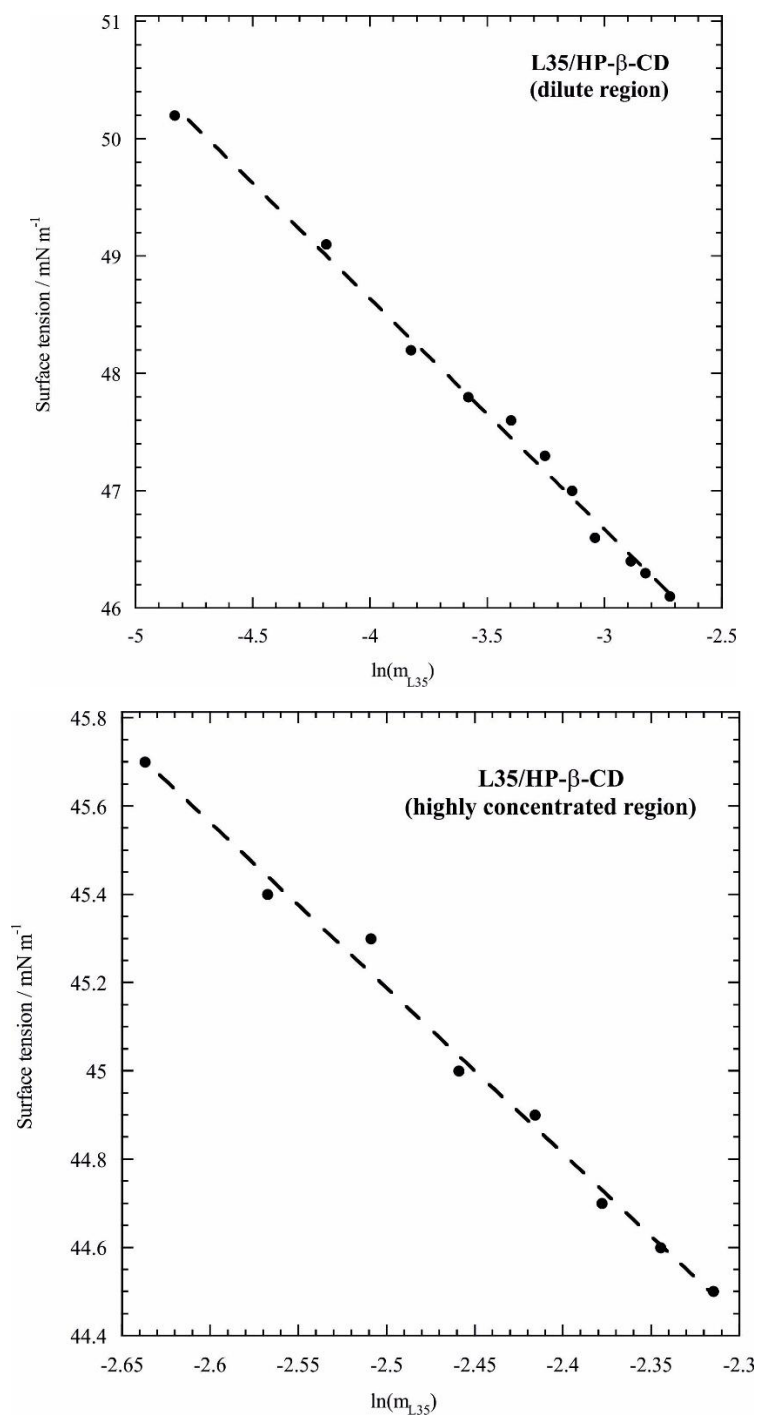

**Fig. 1S.**  $\gamma$  vs  $\ln(mL35)$  plots for L35/HP- $\beta$ -CD. Circular points are the experimental data, while the dashed lines represent the fitting curves according to the Gibbs adsorption isotherm equation, which was used for the determination of the surface excess values (see Table 3).
